# Supplementary material for: Influence of Perceived Baseline Contact on the Acceptability of a Personal Contact Intervention Among People Living With Dementia
Source: Research Square preprint supplement (doi:10.21203/rs.3.rs-125199/v1), 2020-12-28
Supplement: Supplementary file 1 [file 05a74fb6846487b88c6346cf.pdf]

## Acceptability: Version for Residents

ID \_\_\_\_\_ Session # \_\_\_\_\_

NOTE TO INTERVIEWER: *when there is a (name), state the name of personal contact. Provide the response scale to the resident before asking the question, and point to response options when indicated.*

I would like to ask you some questions about today's visit with (name). There is no right or wrong answer.

1. Did you enjoy today's visit with (name)? *point to and state the response options: Yes or no?*

Yes      No

*If the resident says yes to 1, ask 1a and 1b:*

- 1a. How much did you enjoy today's visit with (name)? *point to response options and state A little, mostly or a lot?*

|          |        |       |
|----------|--------|-------|
| A little | Mostly | A lot |
| 1        | 2      | 3     |

- 1b. What did you enjoy about today's visit with (name)? *Write the verbatim response from the resident*

2. Did the visit with (name) help you to feel better ? *point to response options Yes or no?*

Yes      No

*If the resident says yes to 2, ask 2a and 2b:*

- 2a. How much better do you feel after the visit with (name)? *point to response options and state A little, mostly or a lot?*

|          |        |       |
|----------|--------|-------|
| A little | Mostly | A lot |
| 1        | 2      | 3     |

- 2b. Why do you think the visit with (name) helped you feel better? *Write the verbatim response from the resident*

*If the resident says no to 2, ask 2c:*

2c. Why don't you think the visit with (name) helped you feel better? *Write the verbatim response from the resident*

3. Was it easy for you to visit with (name)? *point to and state response options* Yes or no?

Yes      No

*If the resident says yes to 3, ask: How easy was it for you to visit with (name)? point to and state response options* A little, mostly or a lot?

|          |        |       |
|----------|--------|-------|
| A little | Mostly | A lot |
| 1        | 2      | 3     |

4. You will have another visit with (name) next week. Is there anything I can do to make these visits better for you? *Write the verbatim response from the resident*
