# Supplementary material for: Influence of Perceived Baseline Contact on the Acceptability of a Personal Contact Intervention Among People Living With Dementia
Source: Research Square preprint supplement (doi:10.21203/rs.3.rs-125199/v1), 2020-12-28
Supplement: Supplementary file 2 [file 53c786aac1105b0cbf665b75.pdf]

## Demographic Questionnaire--resident version

Site: \_\_\_\_\_

**NOTE:** Statements to be read to the participant are in **bold**; instructions for the RA are in *italics*

**I would like to ask you some questions about people that visit you. Please tell me your best guess.**

**You probably see health care workers from this place a lot. Who else usually visits with you?**

**Do friends visit?** ☐ yes ☐ no

If yes ask: **“Do these visits usually occur over the phone, in person, video conference (e.g., Skype), or some other way?”**

☐ Over the phone

☐ In-person

☐ Over video-conference

☐ Other (*please state mode of visit*): \_\_\_\_\_

**Do you have a spouse that visits?** ☐ yes ☐ no

If yes ask: **“Do these visits usually occur over the phone, in person, video conference (e.g., Skype), or some other way?”**

☐ Over the phone

☐ In-person

☐ Over video-conference

☐ Other (*please state mode of visit*): \_\_\_\_\_

**Do you have children that visit?** ☐ yes ☐ no

If yes ask: **“Do these visits usually occur over the phone, in person, video conference (e.g., Skype), or some other way?”**

☐ Over the phone

☐ In-person

☐ Over video-conference

☐ Other (*please state mode of visit*): \_\_\_\_\_

**Do you have grandchildren visit?** ☐ yes ☐ no

If yes ask: **“Do these visits usually occur over the phone, in person, video conference (e.g., Skype), or some other way?”**

☐ Over the phone

☐ In-person

☐ Over video-conference

☐ Other (*please state mode of visit*): \_\_\_\_\_

**Do any of your siblings visit?** (i.e., sister or brother) ☐ yes ☐ no

If yes ask: **“Do these visits usually occur over the phone, in person, video conference (e.g., Skype), or some other way?”**

☐ Over the phone

☐ In-person

☐ Over video-conference

☐ Other (*please state mode of visit*): \_\_\_\_\_

**Does a paid companion visit?** (May be from another agency) ☐ yes ☐ no

If yes ask: **“Do these visits usually occur over the phone, in person, video conference (e.g., Skype), or some other way?”**

☐ Over the phone

☐ In-person

☐ Over video-conference

☐ Other (*please state mode of visit*): \_\_\_\_\_

**Do volunteer(s) visit?** (could be from the facility volunteer program or another program)

☐ yes ☐ no

If yes ask: **“Do these visits usually occur over the phone, in person, video conference (e.g., Skype), or some other way?”**

☐ Over the phone

☐ In-person

☐ Over video-conference (e.g., skype)

☐ Other (*please state mode of visit*): \_\_\_\_\_

**Do cousin(s) visit:** ☐ yes ☐ no

If yes ask: **“Do these visits usually occur over the phone, in person, video conference (e.g., Skype), or some other way?”**

☐ Over the phone

☐ In-person

☐ Over video-conference

☐ Other (*please state mode of visit*): \_\_\_\_\_

**Do nieces or nephews visit?** ☐ yes ☐ no

If yes ask: **“Do these visits usually occur over the phone, in person, video conference (i.e Skype), or some other way?”**

☐ Over the phone

☐ In-person

☐ Over video-conference

☐ Other (*please state mode of communication*): \_\_\_\_\_

**Is there anyone else that visits?** ☐ yes ☐ no

If yes, please describe: \_\_\_\_\_

If yes ask: **“Do these visits usually occur over the phone, in person, video conference (e.g., Skype), or some other way?”**

- ☐ Over the phone
- ☐ In-person
- ☐ Over video-conference
- ☐ Other *(please state mode of visit)*: \_\_\_\_\_

**Think about all of the people that we just talked about.**

**How often do people visit? Is it:** *(state each response option, in order and one at a time, until the person responds yes to one of the options)*

- ☐ every day
- ☐ a few times per week, but not every day
- ☐ once per week
- ☐ about once per month
- ☐ less than once per month

**Do visits last as long as you would like?**

- ☐ yes
- ☐ no

**About how long do visits last?**

About \_\_\_\_\_ minutes each visit *(can provide a range) OR*

*paraphrase the person's wording if stating number of minutes is not meaningful*

---

**I just have two more questions about you. Do you feel like you belong to a cultural or ethic group?**

- ☐ yes
- ☐ no

**Can you describe this group in your own words?** *(paraphrase the response here)*

---
