# Supplementary material for: Influence of Perceived Baseline Contact on the Acceptability of a Personal Contact Intervention Among People Living With Dementia
Source: Research Square preprint supplement (doi:10.21203/rs.3.rs-125199/v1), 2020-12-28
Supplement: Supplementary file 3 [file aae2ff8a7f2c0b19774fad75.pdf]

**Additional file 1:** Demographic form used in the pilot of Connecting Today, a personal contact intervention for use with people with mild to moderate dementia living in long-term care homes

**Principal investigator:** Hannah M. O'Rourke, PhD, RN, Faculty of Nursing, University of Alberta

**Funders:**

Alzheimer's Society Research Program, New Investigator Award

Faculty of Nursing, University of Alberta, Professorship in Dementia Care Interventions
